# Supplementary material for: Comparative study of different methods for the preparation of tetraamidato- and tetracarboxylatodiruthenium compounds. Structural and magnetic characterization
Source: Royal Society of Chemistry journal article supplement (doi:10.1039/c2dt30939d), 2012-01-01
Supplement: c2dt30939d.pdf [file c2dt30939d.pdf]

# Comparative Study of Different Methods for the Preparation of Tetraamidato- and Tetracarboxylatodiruthenium Compounds. Structural and Magnetic Characterization

Patricia Delgado,<sup>a</sup> Rodrigo González-Prieto,<sup>a</sup> Reyes Jiménez-Aparicio,<sup>a,\*</sup> Josefina Perles,<sup>a</sup> José L. Priego,<sup>a,\*</sup> and Rosario M. Torres.<sup>b</sup>

<sup>a</sup>*Departamento de Química Inorgánica, Facultad de Ciencias Químicas, Universidad Complutense de Madrid, Ciudad Universitaria, E-28040 Madrid, Spain. E-mail: [reyesja@quim.ucm.es](mailto:reyesja@quim.ucm.es); [bermejo@quim.ucm.es](mailto:bermejo@quim.ucm.es)*

<sup>b</sup>*Centro de Asistencia a la Investigación de Rayos X. Facultad de Ciencias Químicas. Universidad Complutense de Madrid. Ciudad Universitaria, 28040 Madrid, Spain.*

## Electronic Supplementary Information:

### Representation of the structure of complexes **3**, **5** and **6**

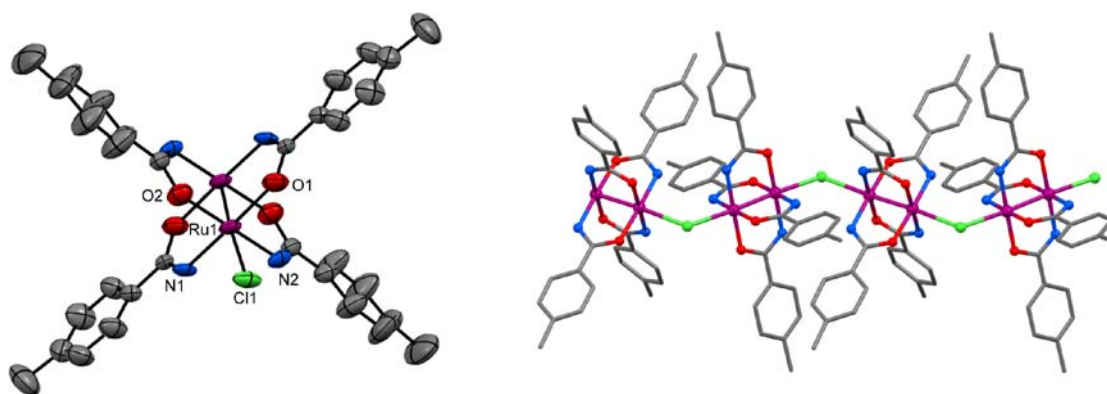

**Figure S1.** Left: thermal-ellipsoid representation of the structure of  $[\text{Ru}_2\text{Cl}(\mu\text{-NHOCC}_6\text{H}_4\text{-}p\text{-Me})_4]$  (**3**), (50% probability ellipsoids). Right: drawing of a zig-zag  $[\text{Ru}_2\text{Cl}(\mu\text{-NHOCC}_6\text{H}_4\text{-}p\text{-Me})_4]_n$  chain. Hydrogen atoms are omitted for clarity.

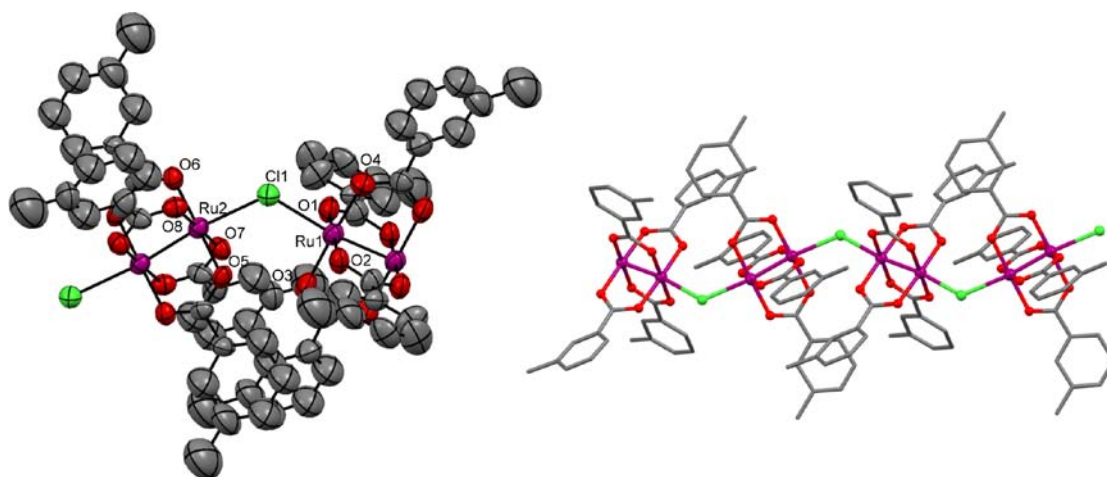

**Figure S2** Left: thermal-ellipsoid representation of the structure of [Ru<sub>2</sub>Cl(μ-O<sub>2</sub>CC<sub>6</sub>H<sub>4</sub>-*m*-Me)<sub>4</sub>] (**5**), (50% probability ellipsoids). Right: drawing of a zig-zag [Ru<sub>2</sub>Cl(μ-O<sub>2</sub>CC<sub>6</sub>H<sub>4</sub>-*m*-Me)<sub>4</sub>]<sub>∞</sub> chain. Hydrogen atoms are omitted for clarity.

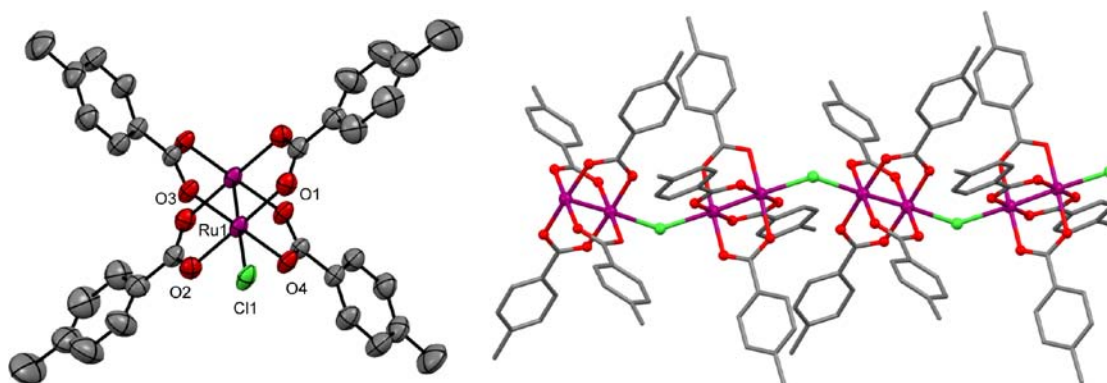

**Figure S3**. Left: thermal-ellipsoid representation of the structure of [Ru<sub>2</sub>Cl(μ-O<sub>2</sub>CC<sub>6</sub>H<sub>4</sub>-*p*-Me)<sub>4</sub>] (**6**), (50% probability ellipsoids). Right: drawing of a zig-zag [Ru<sub>2</sub>Cl(μ-O<sub>2</sub>CC<sub>6</sub>H<sub>4</sub>-*p*-Me)<sub>4</sub>]<sub>∞</sub> chain. Hydrogen atoms are omitted for clarity.

Experimental and calculated curves for complexes **1** and **3-6**

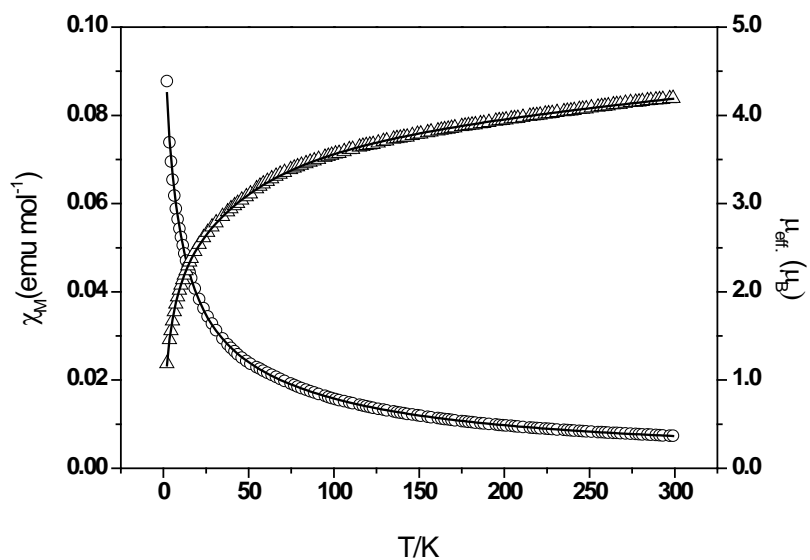

**Figure S4.** Temperature dependence of the molar susceptibility  $\chi_M$  (circles) and  $\mu_{\text{eff}}$ . (triangles) for complex **3**; solid lines are the product of a least-squares fit to the model indicated in the text.

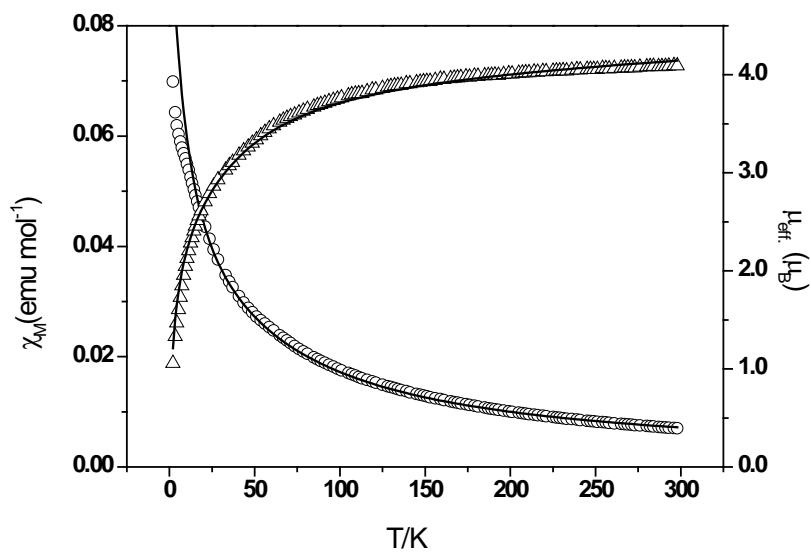

**Figure S5.** Temperature dependence of the molar susceptibility  $\chi_M$  (circles) and  $\mu_{\text{eff}}$ . (triangles) for complex **4**; solid lines are the product of a least-squares fit to the model indicated in the text.

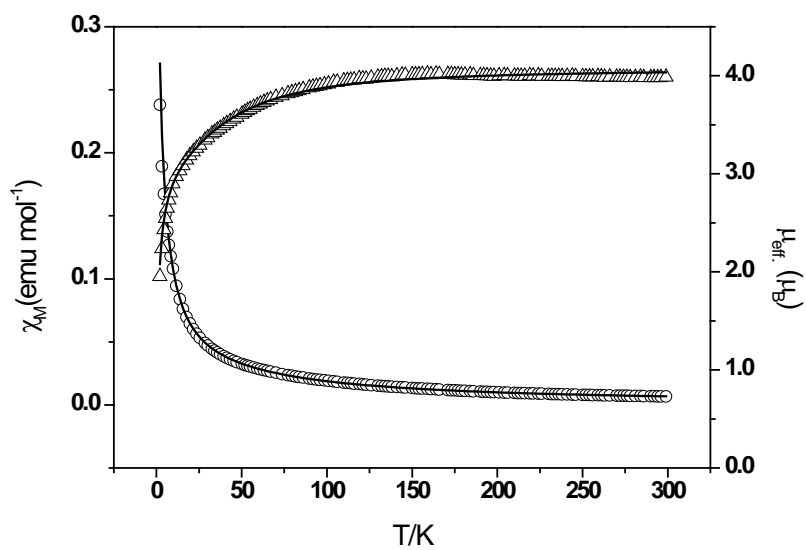

**Figure S6.** Temperature dependence of the molar susceptibility  $\chi_M$  (circles) and  $\mu_{\text{eff}}$ . (triangles) for complex 5; solid lines are the product of a least-squares fit to the model indicated in the text.

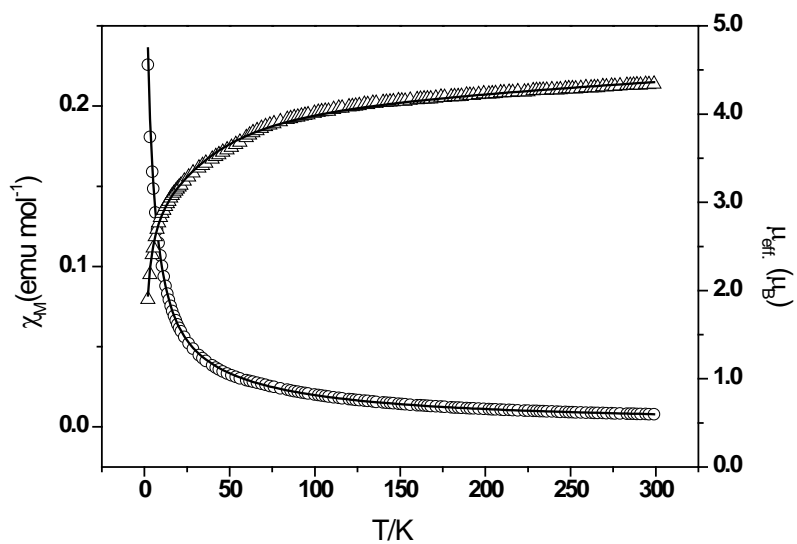

**Figure S7.** Temperature dependence of the molar susceptibility  $\chi_M$  (circles) and  $\mu_{\text{eff}}$ . (triangles) for complex 6; solid lines are the product of a least-squares fit to the model indicated in the text.

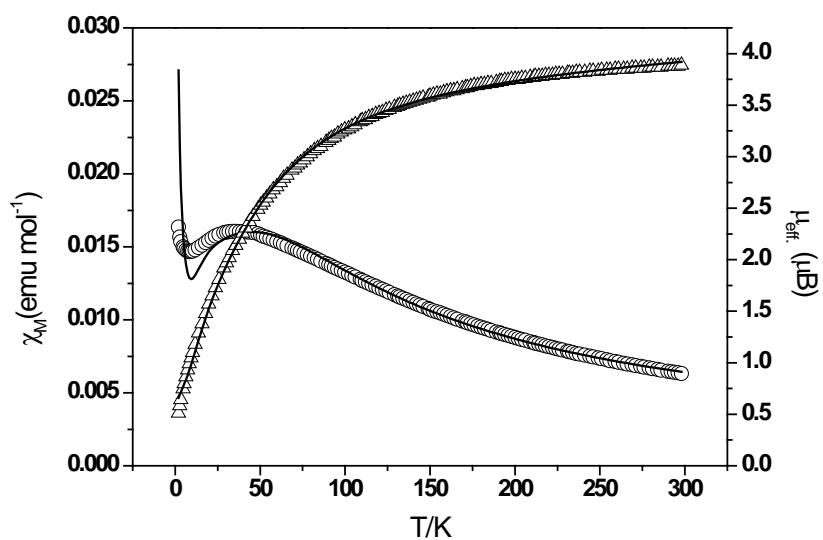

**Figure S8.** Temperature dependence of the molar susceptibility  $\chi_M$  (circles) and  $\mu_{\text{eff}}$  (triangles) for complex **1**. Fit were made considering a mononuclear paramagnetic impurity with  $S=1/2$ ; solid lines are the product of a least-squares fit to the model indicated in the text.

Experimental and calculated diffractogram of complexes **1** - **6**

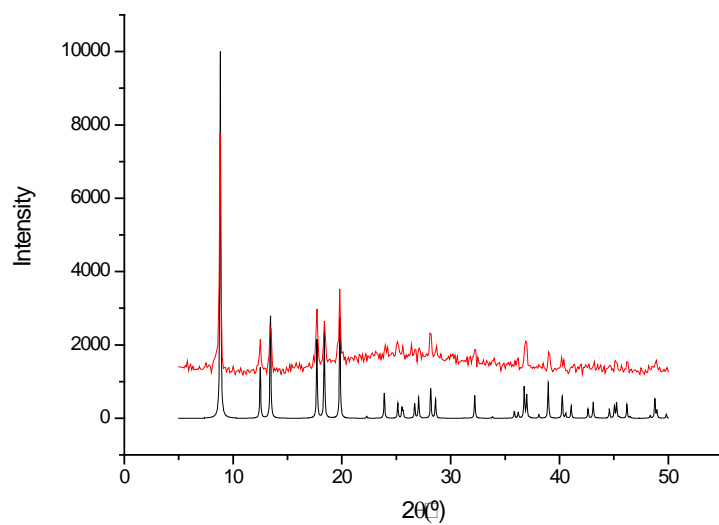

**Figure S9.** Red: Experimental data of X-ray powder diffractometry of compound **1**.  
Black: Diffractogram simulated from single crystal X-ray determination

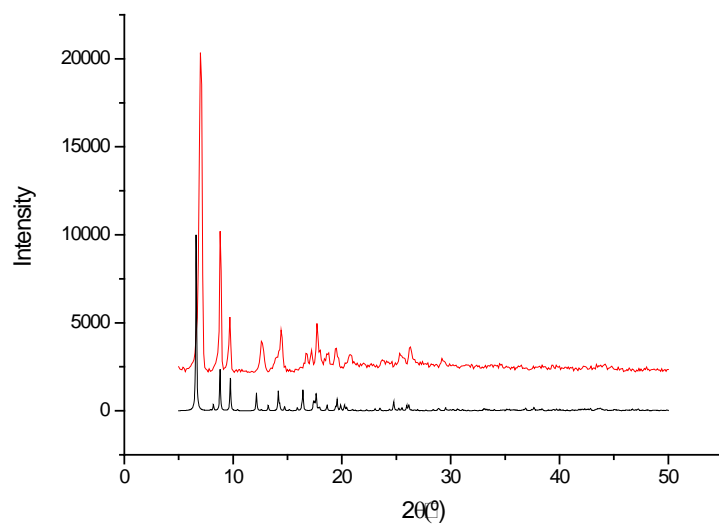

**Figure S10.** Red: Experimental data of X-ray powder diffractometry of compound **2**.  
Black: Diffractogram simulated from single crystal X-ray determination

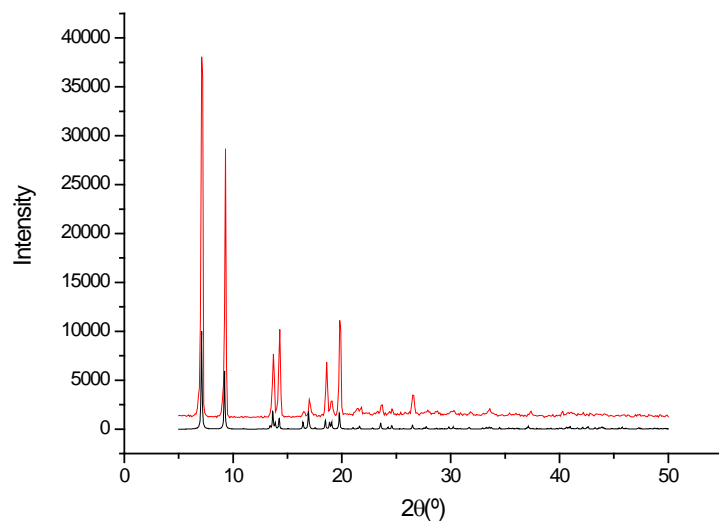

**Figure S11.** Red: Experimental data of X-ray powder diffractometry of compound **3**.  
Black: Diffractogram simulated from single crystal X-ray determination

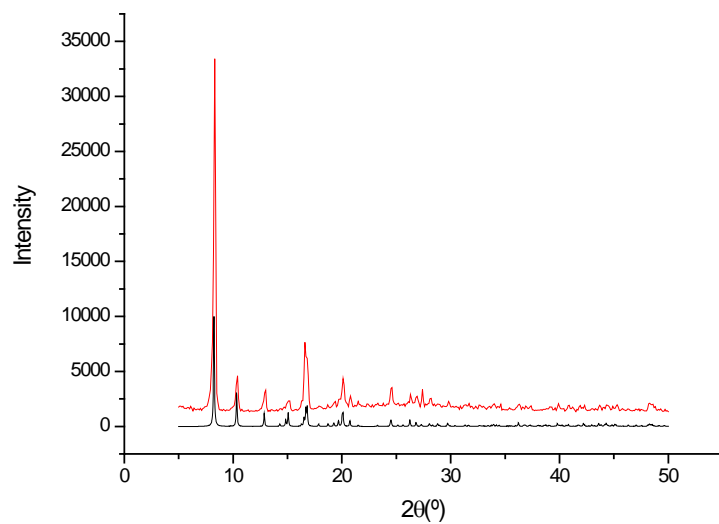

**Figure S12.** Red: Experimental data of X-ray powder diffractometry of compound **4**.  
Black: Diffractogram simulated from single crystal X-ray determination

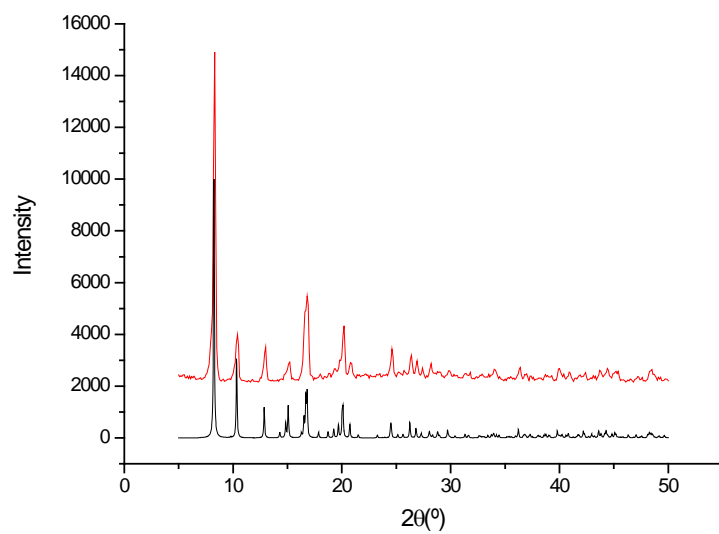

**Figure S13.** Red: Experimental data of X-ray powder diffractometry of compound **5**.  
Black: Diffractogram simulated from single crystal X-ray determination

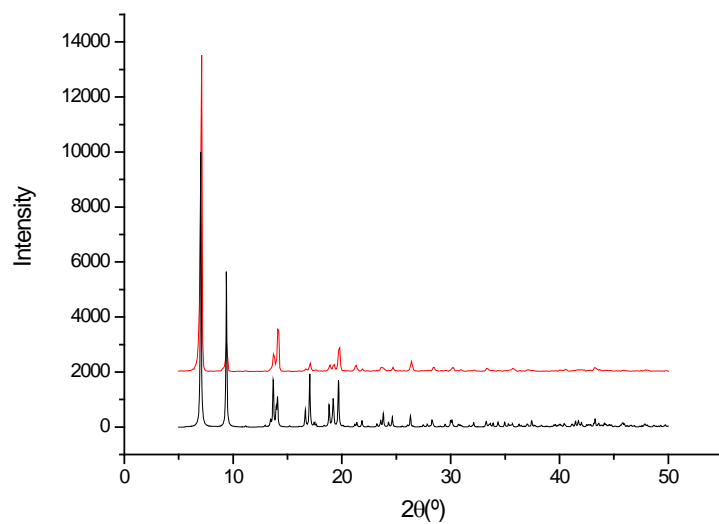

**Figure S14.** Red: Experimental data of X-ray powder diffractometry of compound **6**.  
Black: Diffractogram simulated from single crystal X-ray determination
